# Supplementary material
Source: MDPI journal article supplement (https://www.mdpi.com/2624-8549/5/1/35)
Supplement: s1 [file s1]

# Supplementary Materials

## Conversion of sugar di-ketals to bio-hydrocarbons through the catalytic cracking over Beta catalysts in fixed and fluidized catalytic beds

Cristiane Cardoso<sup>1\*</sup>, Yiu Lau Lam<sup>1</sup>, Marlon B.B. de Almeida <sup>2</sup> and Marcelo Maciel Pereira<sup>1\*</sup>

<sup>1</sup> Universidade Federal do Rio de Janeiro, Instituto de Química, Rio de Janeiro, Brazil.

<sup>2</sup> PETROBRAS, Centro de Pesquisas e Desenvolvimento Leopoldo A. Miguez de Mello (CENPES), Av. Horácio Macedo, 950, 21941-915, Cidade Universitária, Ilha Do Fundão, Rio de Janeiro, RJ, Brazil.

\* Correspondence: cristianecardoso@iq.ufrj.br; maciel@iq.ufrj.br

### SUMÁRIO

|                                                                                                                                                                                                                    |   |
|--------------------------------------------------------------------------------------------------------------------------------------------------------------------------------------------------------------------|---|
| <b>Figure S1.</b> Schematic of the Fixed Bed Unit used in the DX/n-hexane experiments.....                                                                                                                         | 2 |
| <b>Figure S2.</b> Schematic of the Fluid Catalytic Cracking (FCC) Unit used in the DX/n-hexane experiments .....                                                                                                   | 2 |
| <b>Table S1.</b> Table of identified compounds of the general composition of Bio-petroleum (BP) from LC-HRMS analysis on positive ESI mode; Normalized intensity (a.u.) area <sup>1</sup> .....                    | 3 |
| <b>Table S2.</b> Chromatographic identifying factors employed for % mass of product of interest.....                                                                                                               | 3 |
| <b>Table S3.</b> Gas yields obtained by catalytic cracking with 30% percentage change of DX/n-hexane in HBEA <sup>a</sup> and DHBEA <sup>a</sup> .....                                                             | 4 |
| <b>Table S4.</b> Possibility of oxygenated compounds produced from DX/n-hexane reactions in the catalytic cracking of the Beta zeolite with steam treatment at 720°C (DHBEA) .....                                 | 4 |
| <b>Table S5.</b> Possibility of oxygenated compounds produced from DX/n-hexane reactions in the catalytic cracking of the Beta catalyst with steam treatment at 720°C (DAD) .....                                  | 5 |
| <b>Table S6.</b> Yields to gas by percentage of DX obtained by catalytic cracking of n-hexane in FB and FCC, 30%DX/ n-hexane in hydrothermal treatment at 720°C on Beta catalyst, 500 mg of zeolite at 500°C. .... | 6 |

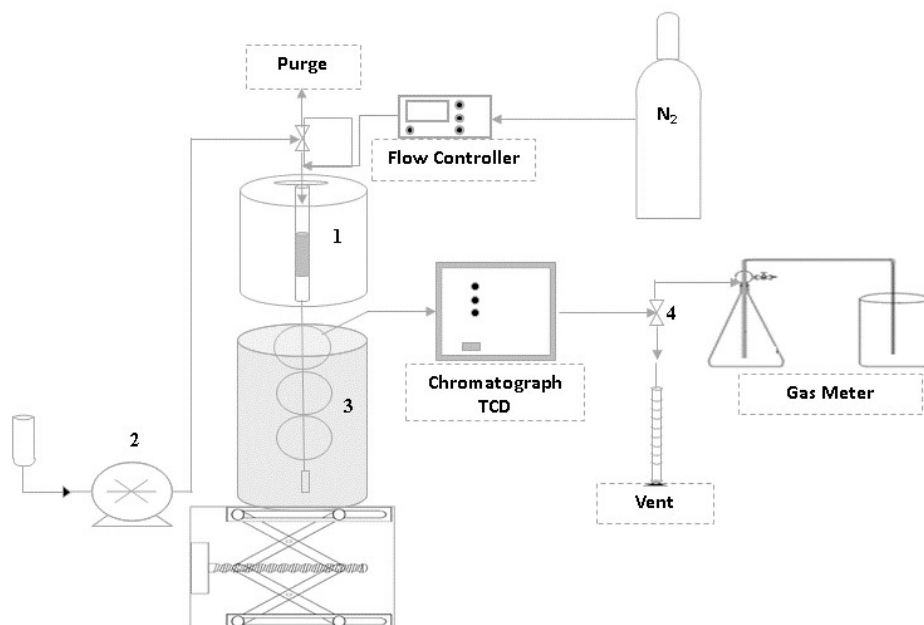

**Figure S1.** Schematic of the Fixed Bed Unit used in the DX/n-hexane experiments

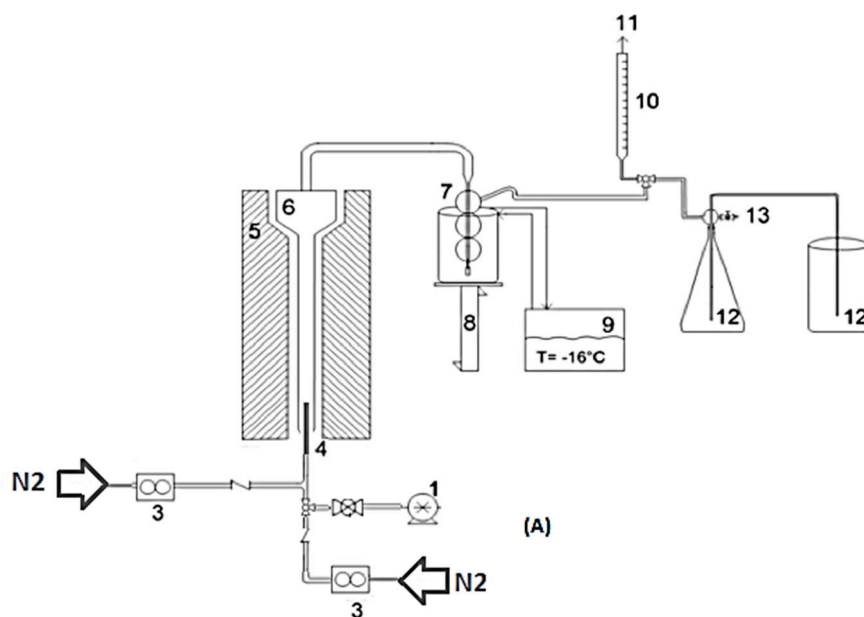

Legend: 1 e 2 - syringe pump; 3 - Flowmeter; 4 - Injection tube; 5- Oven; 6 - Reactor; 7 - Condenser; 8 - Elevator; 9 - Chiller; 10 - Gas meter; 11 - Vent; 12 - Liquid entrainment gas meter; 13 - Gas recovery valve

**Figure S2.** Schematic of the Fluid Catalytic Cracking (FCC) Unit used in the DX/n-hexane experiments

**Table S1.** Table of identified compounds of the general composition of Bio-petroleum (BP) from LC-HRMS analysis on positive ESI mode; Normalized intensity (a.u.) area <sup>1</sup>.

| Compounds of BP         |                                    | m/z <sup>a</sup> |
|-------------------------|------------------------------------|------------------|
| Hexose acetals          | Glucose monoacetal                 | 238.12817        |
|                         | Glucose diacetal                   | 278.15945        |
|                         | Diehexose triacetal                | 480.24353        |
|                         | Pentose-hexose triacetal           | 450.23322        |
|                         | Dipentose-hexose tetracetal        | 622.30731        |
| Lignin derivatives      | Feruloylquimic acid                | 367.10364        |
|                         | p-Coumaroylquimic acid             | 337.09329        |
|                         | p-Coumaric acid                    | 163.03923        |
| Pentose acetals         | Xylose monoacetal                  | 208.11780        |
|                         | Xylose diacetal                    | 248.14908        |
|                         | Dipentose monoacetal               | 340.15982        |
|                         | Dipentose diacetal                 | 380.19119        |
|                         | Dipentose triacetal                | 420.22232        |
|                         | Tripentose triacetal               | 552.26532        |
|                         | Tripentose tetracetal              | 592.29645        |
|                         | Tetrapentose pentacetal            | 764.37000        |
| Pentoses-acids acetals  | Pentose-glucuronic acid monoacetal | 384.14957        |
|                         | Pentose-ferulic acid monoacetal    | 384.16483        |
|                         | Dipentose-ferulic acid diacetal    | 539.21210        |
|                         | Dipentose-p-coumaric acid diacetal | 509.20230        |
|                         | Pentose-p-coumaric acid monoacetal | 335.11395        |
| Pentose-acetate acetals | Pentose monoacetal acetate         | 250.12827        |
|                         | Dipentose monoacetal acetate       | 382.17032        |
|                         | Dipentose diacetal acetate         | 422.20169        |
|                         | Tripentose triacetal acetate       | 594.27643        |

<sup>a</sup> Legend: m/z- Mass/charge

**Table S2.** Chromatographic factors employed for % mass of product of interest

| Compound types          | Factor | Observations                                                    |
|-------------------------|--------|-----------------------------------------------------------------|
| Mono aromatics          | 0.82   | Major product                                                   |
| Acetone                 | 0.28   | Major product                                                   |
| Other liquid oxygenates | 0.17   | Furans, phenols, products of aldo condensations,                |
| Remaining products (RP) | 1.00   | Olefins, paraffins, poly-aromatics, unidentified<br>Hydrocarbon |

**Table S3.** Gas yields obtained by catalytic cracking with 30% percentage change of DX/n-hexane in HBEA <sup>a</sup> and DHBEA <sup>a</sup>.

|              | Gas (%wt)      |                 |                               |                               |                               |                               |                                |                               |     |                 |             |
|--------------|----------------|-----------------|-------------------------------|-------------------------------|-------------------------------|-------------------------------|--------------------------------|-------------------------------|-----|-----------------|-------------|
|              | H <sub>2</sub> | CH <sub>4</sub> | C <sub>2</sub> H <sub>4</sub> | C <sub>2</sub> H <sub>6</sub> | C <sub>3</sub> H <sub>8</sub> | C <sub>3</sub> H <sub>6</sub> | C <sub>4</sub> H <sub>10</sub> | C <sub>4</sub> H <sub>8</sub> | CO  | CO <sub>2</sub> | Total       |
| <b>DHBEA</b> | 0.1            | 2.1             | 0.2                           | 0.0                           | 0.0                           | 0.1                           | 0.0                            | 0.0                           | 2.9 | 0.6             | <b>6.0</b>  |
| <b>HBEA</b>  | 0.2            | 2.3             | 0.4                           | 0.1                           | 0.2                           | 0.7                           | 0.3                            | 0.3                           | 6.1 | 2.1             | <b>12.8</b> |

<sup>a</sup> 500 mg of zeolite - WHSV (16h<sup>-1</sup>) and reaction temperature of 500°C.

**Table S4.** Possibility of oxygenated compounds produced from DX/n-hexane reactions in the catalytic cracking of the Beta zeolite with steam treatment at 720°C (DHBEA)

| Content de DX- 30%                      |                     |
|-----------------------------------------|---------------------|
| Oxygenates                              | Normalized Area (%) |
| 2,3-dimethylfuran                       | 0.0250              |
| 2-Butanone                              | 0.0088              |
| 2-Cyclopenten-1-one                     | 0.0475              |
| 2-Cyclopenten-1-one, 2-methyl-          | 0.0404              |
| 2-Cyclopenten-1-one, 3,4-dimethyl-      | 0.0098              |
| 3-Penten-2-one                          | 0.0093              |
| Benzofuran, 4,7-dimethyl-               | 0.0070              |
| Bicyclo[3.3.0]oct-2-en-8-one, 3-methyl- | 0.0082              |
| Furan, 2,3,5-trimethyl-                 | 0.1289              |
| Methyl vinyl ketone                     | 0.0343              |
| 1H-Inden-1-one, 2,3,4,5,6,7-hexahydro   | 0.0065              |
| 1-Methoxy-3-methyl-3-butene             | 0.0069              |
| 1-Methoxyadamantane                     | 0.0126              |
| 2-(2-Hydroxyphenyl)buta-1,3-diene       | 0.0039              |
| 2,4-Dimethylfuran                       | 0.0021              |
| 2-Cyclopenten-1-one, 2,3-dimethyl-      | 0.0467              |
| 2-Cyclopenten-1-one, 3-methyl-          | 0.0600              |
| 2-n-Butyl furan                         | 0.0196              |
| 2-n-Heptylcyclopentanone                | 0.0314              |
| 2-Vinylfuran                            | 0.0042              |
| 4,5,6,7-Tetrahydro-3-methylbenzofuran   | 0.0305              |

|                                                               |        |
|---------------------------------------------------------------|--------|
| 4,5-Dimethyl-3-heptanol                                       | 0.0046 |
| 5-Methylene-1,3a,4,5,6,6a-hexahydropentalen-1-ol              | 0.0070 |
| Acetone                                                       | 2.4195 |
| Benzofuran                                                    | 0.0054 |
| Benzofuran, 2-methyl-                                         | 0.0123 |
| Cyclodecanone                                                 | 0.0283 |
| Cyclopentanone, 3,4-bis(methylene)-                           | 0.0056 |
| Furan                                                         | 0.0215 |
| Furan, 2,5-dimethyl-                                          | 0.0698 |
| Furan, 2-ethyl-                                               | 0.0059 |
| Furan, 2-ethyl-5-methyl-                                      | 0.0283 |
| Furan, 2-methyl-                                              | 0.0512 |
| Oxepine, 2,7-dimethyl-                                        | 0.0041 |
| Phenol                                                        | 0.0519 |
| Phenol, 2-methyl-                                             | 0.0069 |
| Phenol, 3-methyl-                                             | 0.0512 |
| Propanal, 2-methyl-                                           | 0.0045 |
| $\alpha$ -D-Xylofuranose, 1,2:3,5-bis-O-(1-methylethylidene)- | 0.0389 |

**Table S5.** Possibility of oxygenated compounds produced from DX/n-hexane reactions in the catalytic cracking of the Beta catalyst with steam treatment at 720°C (DAD)

| Content de DX- 30%                        |                     |
|-------------------------------------------|---------------------|
| Oxygenates                                | Normalized Area (%) |
| Acetone                                   | 0.0001228           |
| 1,2-Butanediol, 1-phenyl-                 | 0.0000899           |
| 1,3-Cyclobutanediol, 2,2,4,4-tetramethyl- | 0.0001018           |
| 1-Methoxy-1,3-cyclohexadiene              | 0.0000343           |
| 2,3-Dimethylfuran                         | 0.0001448           |
| 2,4-Dimethylfuran                         | 0.0003798           |
| 2-Cyclohexen-1-one                        | 0.0000271           |
| 2-Cyclopenten-1-one, 2,3-dimethyl-        | 0.0000375           |
| 2-Cyclopenten-1-one, 3-methyl-            | 0.0000796           |
| 2-Propenal, 2-methyl-3-phenyl-            | 0.0000526           |
| 3-Furaldehyde                             | 0.0001194           |

|                                     |           |
|-------------------------------------|-----------|
| 3-Methyl-1-dodecyn-3-ol             | 0.0000513 |
| 3-Pentanone                         | 0.0000049 |
| Benzofuran                          | 0.0000410 |
| Benzofuran, 2-methyl-               | 0.0001799 |
| Benzofuran, 7-methyl-               | 0.0000282 |
| Benzyl methyl ketone                | 0.0000090 |
| Cyclohexanol, 2-methylene-6-methyl- | 0.0004571 |
| Cyclopentanone                      | 0.0000149 |
| Dibenzofuran, 4-methyl-             | 0.0000024 |
| Ethanone, 1-(2-furanyl)-            | 0.0002463 |
| Furan, 2-(2-propenyl)-              | 0.0000236 |
| Furan, 2,5-dimethyl-                | 0.0004160 |
| Furan, 2-ethyl-                     | 0.0001420 |
| Phenol                              | 0.0001285 |
| Phenol, 2,3-dimethyl-               | 0.0000091 |
| Phenol, 2,4-dimethyl-               | 0.0000265 |
| Phenol, 2,5-dimethyl-               | 0.0000176 |
| Phenol, 2-methyl-                   | 0.0000424 |
| Phenol, 3-(2-phenylethenyl)-, (E)-  | 0.0000062 |
| Phenol, 3,4-dimethyl-               | 0.0000084 |
| Phenol, 3-methyl-                   | 0.0000524 |
| Phenol, 4-(2-phenylethenyl)-        | 0.0000094 |
| Tetramethylfuran                    | 0.0000298 |

**Table S6.** Yields to gas by percentage of DX obtained by catalytic cracking of n-hexane in FB and FCC, 30%DX/ n-hexane in the Beta catalyst hydrothermally treated at 720°C, 500 mg of zeolite at 500°C.

| Gas (%wt) |      |                |                 |                               |                               |                               |                               |                                |                               |     |                 |       |
|-----------|------|----------------|-----------------|-------------------------------|-------------------------------|-------------------------------|-------------------------------|--------------------------------|-------------------------------|-----|-----------------|-------|
| DX (30%)  | Unit | H <sub>2</sub> | CH <sub>4</sub> | C <sub>2</sub> H <sub>4</sub> | C <sub>2</sub> H <sub>6</sub> | C <sub>3</sub> H <sub>8</sub> | C <sub>3</sub> H <sub>6</sub> | C <sub>4</sub> H <sub>10</sub> | C <sub>4</sub> H <sub>8</sub> | CO  | CO <sub>2</sub> | Total |
| DAD       | FB   | 0.0            | 1.2             | 0.0                           | 0.0                           | 0.0                           | 0.1                           | 0.0                            | 0.0                           | 2.6 | 0.1             | 4.0   |
|           | FCC  | 1.1            | 3.4             | 0.2                           | 0.1                           | 0.0                           | 0.4                           | 0.0                            | 0.1                           | 3.1 | 1.6             | 10.0  |
